# Supplementary material for: Structural and electronic studies of metal carbide clusterfullerene Sc2C2@Cs–C72
Source: Royal Society of Chemistry journal article supplement (doi:10.1039/c3nr01739g), 2013-01-01
Supplement: c3nr01739g.pdf [file c3nr01739g.pdf]

## Supporting Information

### Structural and Electronic Studies of Metal Carbide Clusterfullerene $\text{Sc}_2\text{C}_2@C_s\text{-C}_{72}$

Yongqiang Feng, Taishan Wang,\* Jingyi Wu, Lai Feng,\* Junfeng Xiang, Yihan Ma,  
Zhuxia Zhang, Li Jiang, Chunying Shu, and Chunru Wang\*

#### Contents

**Figure S1.** The first stage HPLC profile of the toluene extract of the soot containing scandium endohedral metallofullerenes (20×250 mm Buckyprep column; flow rate 12 mL/min; toluene as eluent).

**Figure S2.** The second stage HPLC profile of  $\text{C}_{84}$  and  $\text{Sc}_2\text{C}_2@C_{72}\text{-C}_s$  fullerenes (20×250 mm Buckyprep-M column; flow rate 9 mL/min; toluene as eluent).

**Figure S3.** Chromatogram of the isolated  $\text{Sc}_2\text{C}_2@C_{72}\text{-C}_s$  (20×250 mm Buckyprep column; flow rate 12 mL/min; toluene as eluent).

**Figure S4.** Chromatogram of the isolated  $\text{Sc}_2\text{C}_2@C_{72}\text{-C}_s$  (20×250 mm Buckyprep-M column; flow rate 12 mL/min; toluene as eluent).

**Figure S5.** MALDI-TOF mass spectrum of  $\text{Sc}_2\text{C}_2@C_{72}\text{-C}_s$ .

**Figure S6.** UV/Vis-NIR spectrum of purified  $\text{Sc}_2\text{C}_2@C_{72}\text{-C}_s$  in toluene.

**Figure S7.** Cyclic voltammetry profile of  $\text{Sc}_2\text{C}_2@C_s(10528)\text{-C}_{72}$  in *o*-DCB. Scan rate, 100 mV s<sup>-1</sup>

**Figure S8.** Experimental <sup>45</sup>Sc NMR spectrum (CS<sub>2</sub>, 145 MHz) of  $\text{Sc}_2\text{C}_2@C_s\text{-C}_{72}$ .

**Figure S9.** A view of X-ray structure of  $\text{Sc}_2\text{C}_2@C_{72}\text{-C}_s$ .

**Figure S10.** Optimized structure of  $\text{Sc}_2\text{C}_2@C_{72}\text{-C}_s$ .

**Figure S11.** Experimental <sup>13</sup>C NMR Chemical Shifts for  $\text{Sc}_2\text{C}_2@C_{72}\text{-C}_s$ .

**Figure S12.** DFT calculated isodensity surface plots for the HOMO and LUMO of  $\text{Sc}_2\text{C}_2@C_s(10528)\text{-C}_{72}$ .

**Table S1.** UV/vis-NIR absorptions of  $\text{Sc}_2\text{C}_2@C_s\text{-C}_{72}$  and  $\text{Sc}_2\text{S}@C_s\text{-C}_{72}$ .

**Table S2.** Experimental and Calculated <sup>13</sup>C NMR Chemical Shifts for  $\text{Sc}_2\text{C}_2@C_{72}\text{-C}_s$ .

Cartesian coordinates of  $\text{Sc}_2\text{C}_2@C_{72}\text{-C}_s$  predicted at the PBE/DNP level of theory

## Experimental Section:

### 1. The synthesis and purification of $\text{Sc}_2\text{C}_2@\text{C}_{72}\text{-C}_s$

Graphite rods were core-drilled and subsequently packed with a mixture of Sc/Ni<sub>2</sub> alloy and graphite powder in a weight ratio of 2:1. These rods were then vaporized in a Krätschmer-Huffman generator at 200 Torr He. The resulting soot was Soxlet-extracted with toluene for 24 h.  $\text{Sc}_2\text{C}_2@\text{C}_{72}\text{-C}_s$  was isolated from various empty fullerenes and other scandium metallofullerenes by HPLC.

### 2. HPLC data of purified $\text{Sc}_2\text{C}_2@\text{C}_{72}\text{-C}_s$

The stage 1 and 2 separations were repeated several times to obtain purified  $\text{Sc}_2\text{C}_2@\text{C}_{72}\text{-C}_s$ . Figure S3 and Figure S4 show the HPLC data of purified  $\text{Sc}_2\text{C}_2@\text{C}_{72}\text{-C}_s$  with Buckyprep and Buckyprep-M columns. These HPLC analyses also confirm the purity of  $\text{Sc}_2\text{C}_2@\text{C}_{72}\text{-C}_s$ .

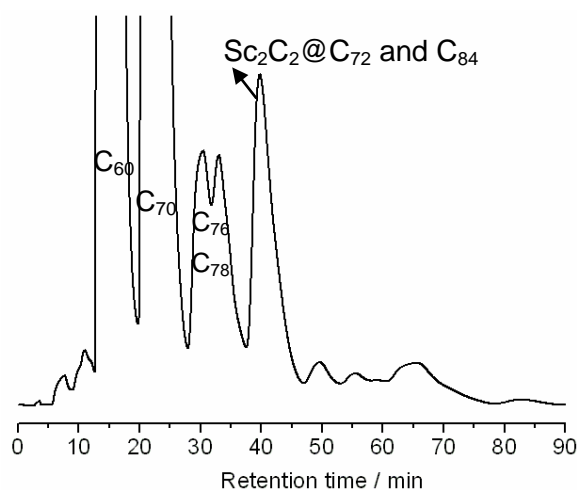

**Figure S1.** The first stage HPLC profile of toluene extract of the soot containing scandium endohedral metallofullerenes (20×250 mm Buckyprep column; flow rate 12 mL/min; toluene as eluent).

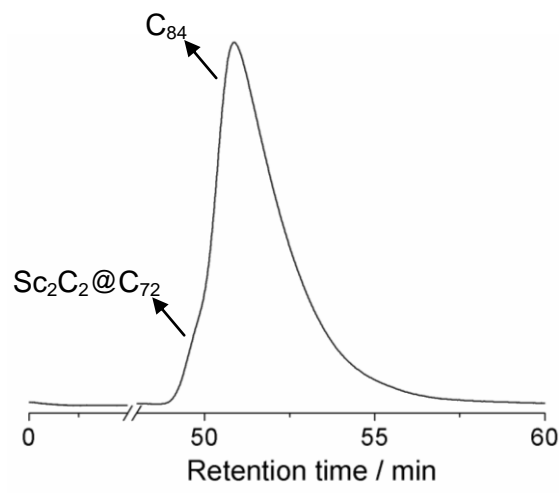

**Figure S2.** The second stage HPLC profile of C<sub>84</sub> and  $\text{Sc}_2\text{C}_2@\text{C}_{72}\text{-C}_s$  fullerenes (20×250 mm Buckyprep column; flow rate 9 mL/min; toluene as eluent).

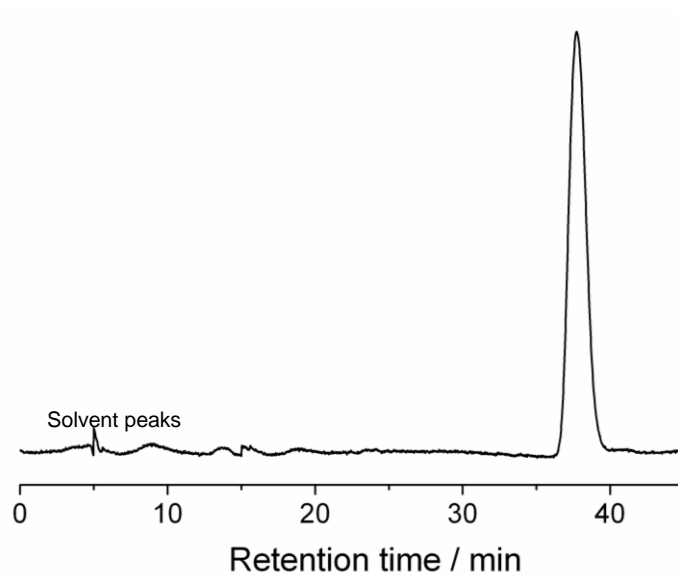

**Figure S3.** Chromatogram of the isolated  $\text{Sc}_2\text{C}_2@\text{C}_{72}\text{-C}_s$  (20×250 mm Buckyprep column; flow rate 12 mL/min; toluene as eluent).

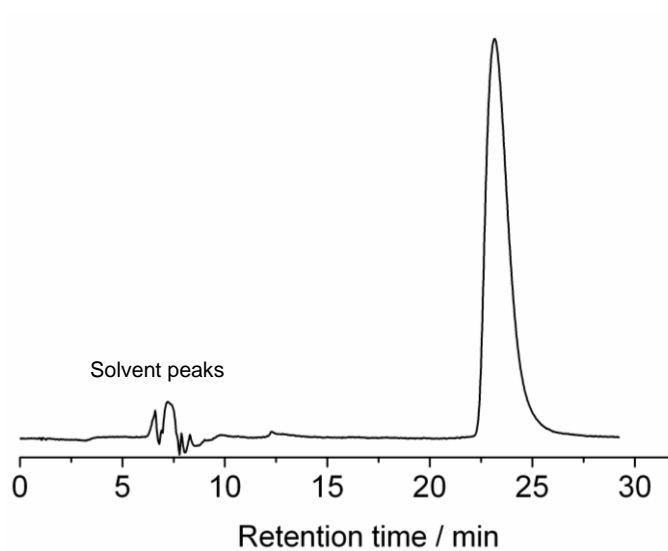

**Figure S4.** Chromatogram of the isolated  $\text{Sc}_2\text{C}_2@\text{C}_{72}\text{-C}_s$  (20×250 mm Buckyprep-M column; flow rate 12 mL/min; toluene as eluent).

### 3. MALDI-TOF mass spectrum of purified $\text{Sc}_2\text{C}_2@\text{C}_{72}\text{-C}_s$

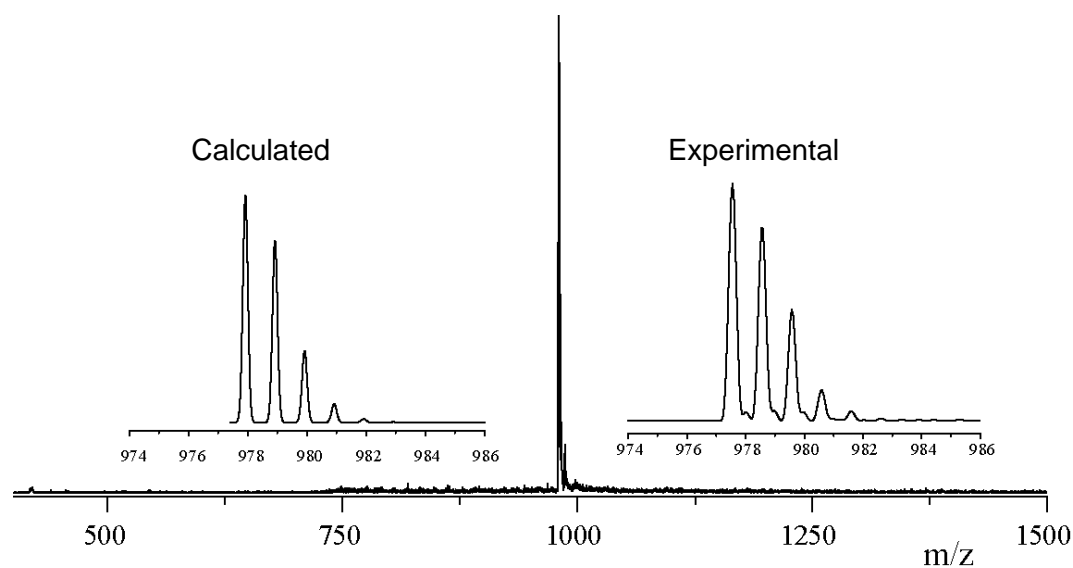

**Figure S5.** MALDI-TOF mass spectrum of pure  $\text{Sc}_2\text{C}_2@\text{C}_{72}\text{-C}_s$ . The insets show the experimental and calculated isotope distributions of  $\text{Sc}_2\text{C}_2@\text{C}_{72}\text{-C}_s$ .

### 4. UV/Vis-NIR spectrum of purified $\text{Sc}_2\text{C}_2@\text{C}_{72}\text{-C}_s$

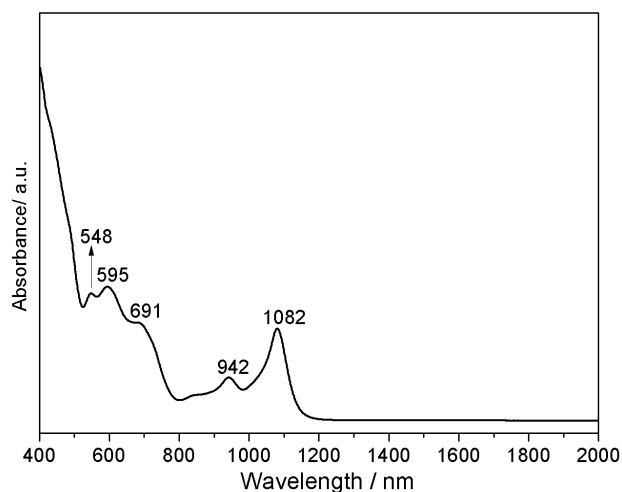

**Figure S6.** UV/Vis-NIR spectrum of purified  $\text{Sc}_2\text{C}_2@\text{C}_{72}\text{-C}_s$  in  $\text{CS}_2$ .

The UV/vis-NIR absorption spectrum of  $\text{Sc}_2\text{C}_2@\text{C}_s\text{-C}_{72}$  is shown in Figure S5, displaying five obvious absorption peaks at 548, 595, 691, 942, and 1082 nm. Such spectral pattern is similar to that of  $\text{Sc}_2\text{S}@\text{C}_s\text{-C}_{72}$ , in which absorption peaks were observed at 432, 535, 583, 678, 939, and

1076 nm<sup>S1</sup>. All the featured absorptions of these two species are listed in Table 1. It is well known that the absorptions of metallofullerenes are mainly due to the  $\pi$ - $\pi^*$  transitions, which are characteristic of the symmetry as well as the electronic structure of the fullerene cage.<sup>S2</sup> The absorption differences between Sc<sub>2</sub>C<sub>2</sub>@C<sub>s</sub>-C<sub>72</sub> and Sc<sub>2</sub>S@C<sub>s</sub>-C<sub>72</sub> can be attributed to the different motional behaviors of endohedral clusters or to the different contributions of (C<sub>2</sub>)<sup>2-</sup> and S<sup>2-</sup> units, which might impose different influence on the cage symmetries and electronic structures of fullerenes. Moreover, for Sc<sub>2</sub>C<sub>2</sub>@C<sub>s</sub>-C<sub>72</sub>, the spectral onset of 1224 nm corresponds to a band gap of 1.01 eV. As for Sc<sub>2</sub>S@C<sub>s</sub>-C<sub>72</sub>, the spectral onset is 1192 nm, suggesting a band gap of 1.04 eV.

Table S1. UV/vis–NIR absorptions of Sc<sub>2</sub>C<sub>2</sub>@C<sub>s</sub>-C<sub>72</sub> and Sc<sub>2</sub>S@C<sub>s</sub>-C<sub>72</sub>.

| compound                                                        | absorption peaks (nm) |     |     |     |      |
|-----------------------------------------------------------------|-----------------------|-----|-----|-----|------|
| Sc <sub>2</sub> C <sub>2</sub> @C <sub>s</sub> -C <sub>72</sub> | 548                   | 595 | 691 | 942 | 1082 |
| Sc <sub>2</sub> S@C <sub>s</sub> -C <sub>72</sub> <sup>S1</sup> | 535                   | 583 | 678 | 939 | 1076 |

## 5. CV measurement of Sc<sub>2</sub>C<sub>2</sub>@C<sub>s</sub>(10528)-C<sub>72</sub>

Electrochemistry experiments were carried out in *o*-DCB solvent (0.05 M (n-Bu)<sub>4</sub>NPF<sub>6</sub>, scan rate, 100 mV s<sup>-1</sup>) with glassy carbon as the working, Pt wire and Ag wire as the counter and reference electrodes, respectively. The potentials were referred to the E<sub>1/2</sub> value of the Fc/Fc<sup>+</sup> redox couple measured in the sample solution.

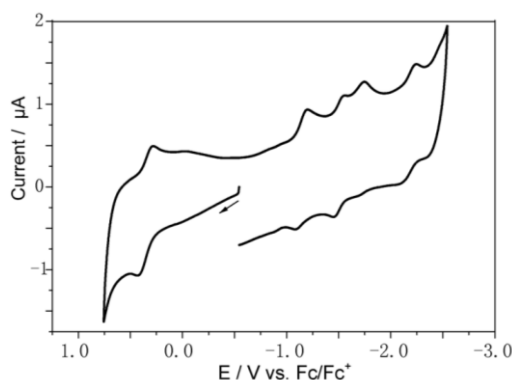

**Figure S7.** Cyclic voltammetry profile of Sc<sub>2</sub>C<sub>2</sub>@C<sub>s</sub>(10528)-C<sub>72</sub> in *o*-DCB. Scan rate, 100 mV s<sup>-1</sup>.

## 6. <sup>45</sup>Sc NMR spectrum of Sc<sub>2</sub>C<sub>2</sub>@C<sub>s</sub>(10528)-C<sub>72</sub>

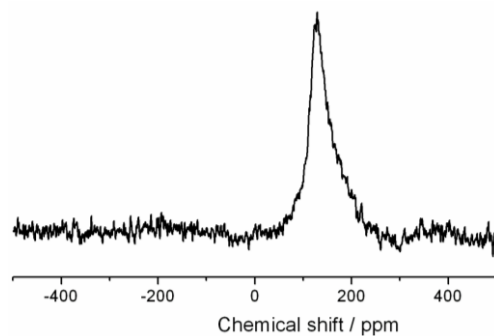

**Figure S8.** Experimental  $^{45}\text{Sc}$  NMR spectrum ( $\text{CS}_2$ , 145 MHz) of  $\text{Sc}_2\text{C}_2@C_s\text{-C}_{72}$ .

### 7. X-ray structure of $\text{Sc}_2\text{C}_2@C_s(10528)\text{-C}_{72}$

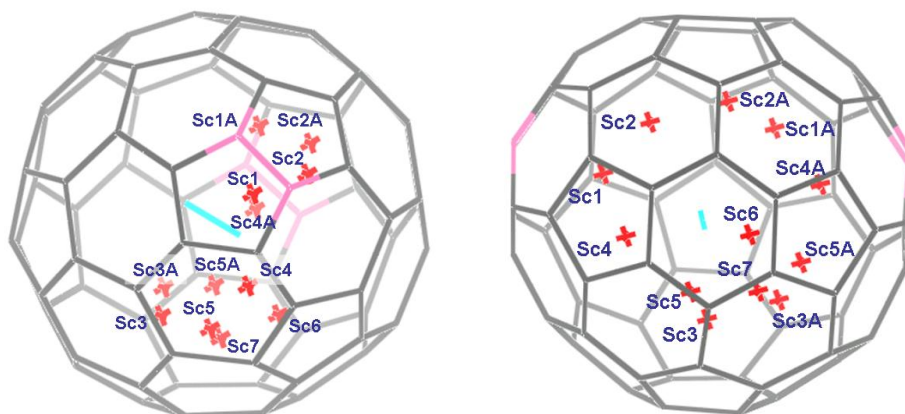

**Figure S9.** Two views of X-ray structure of  $\text{Sc}_2\text{C}_2@C_s(10528)\text{-C}_{72}$ , showing the distribution of disordered Sc positions. Those Sc sites labeled “A” are generated by the crystallographic mirror plane. Occupancies for these Sc positions are: Sc1, 0.249; Sc2, 0.212; Sc3, 0.190; Sc4, 0.143; Sc5, 0.127; Sc6, 0.094; Sc7, 0.061.

## Calculation Section:

### 1. DFT calculated structure of $\text{Sc}_2\text{C}_2@C_{72}-C_s$

Density functional theory (DFT) calculations were performed to study the geometric structure of  $\text{Sc}_2\text{C}_2@C_{72}-C_s$  at GGA-PBE/DNP<sup>S3</sup> level by using the Dmol<sup>3</sup> code<sup>S4, S5</sup>.

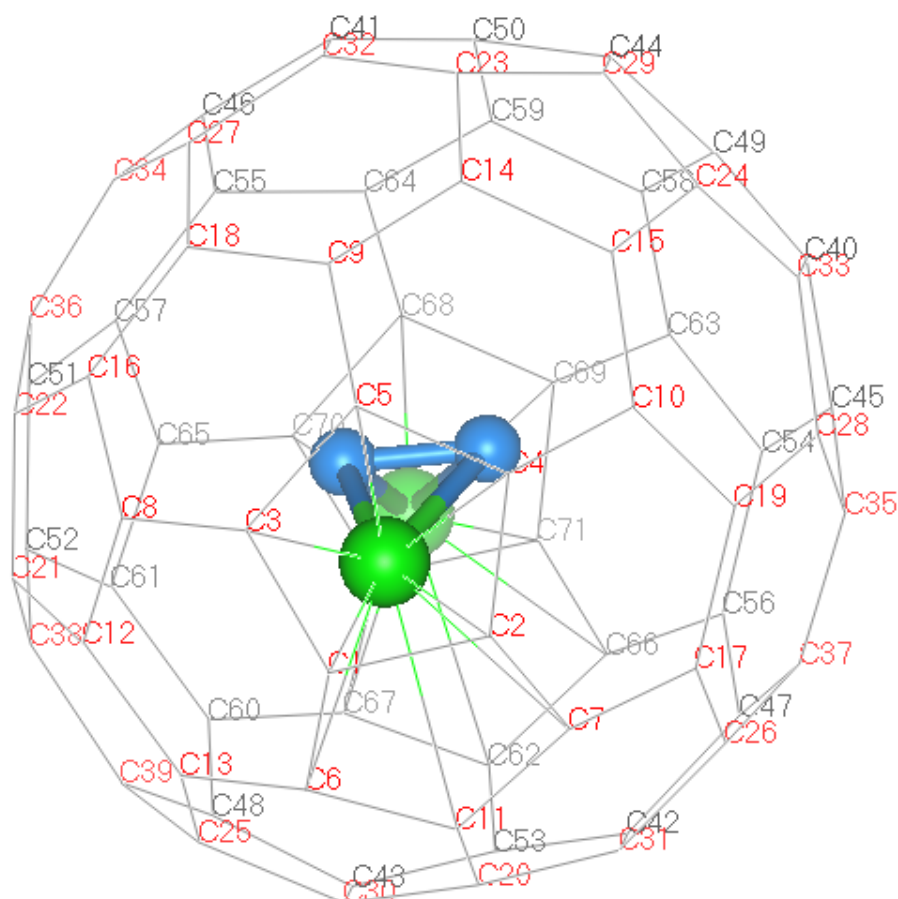

**Figure S10.** Optimized structure of  $\text{Sc}_2\text{C}_2@C_{72}-C_s$ .

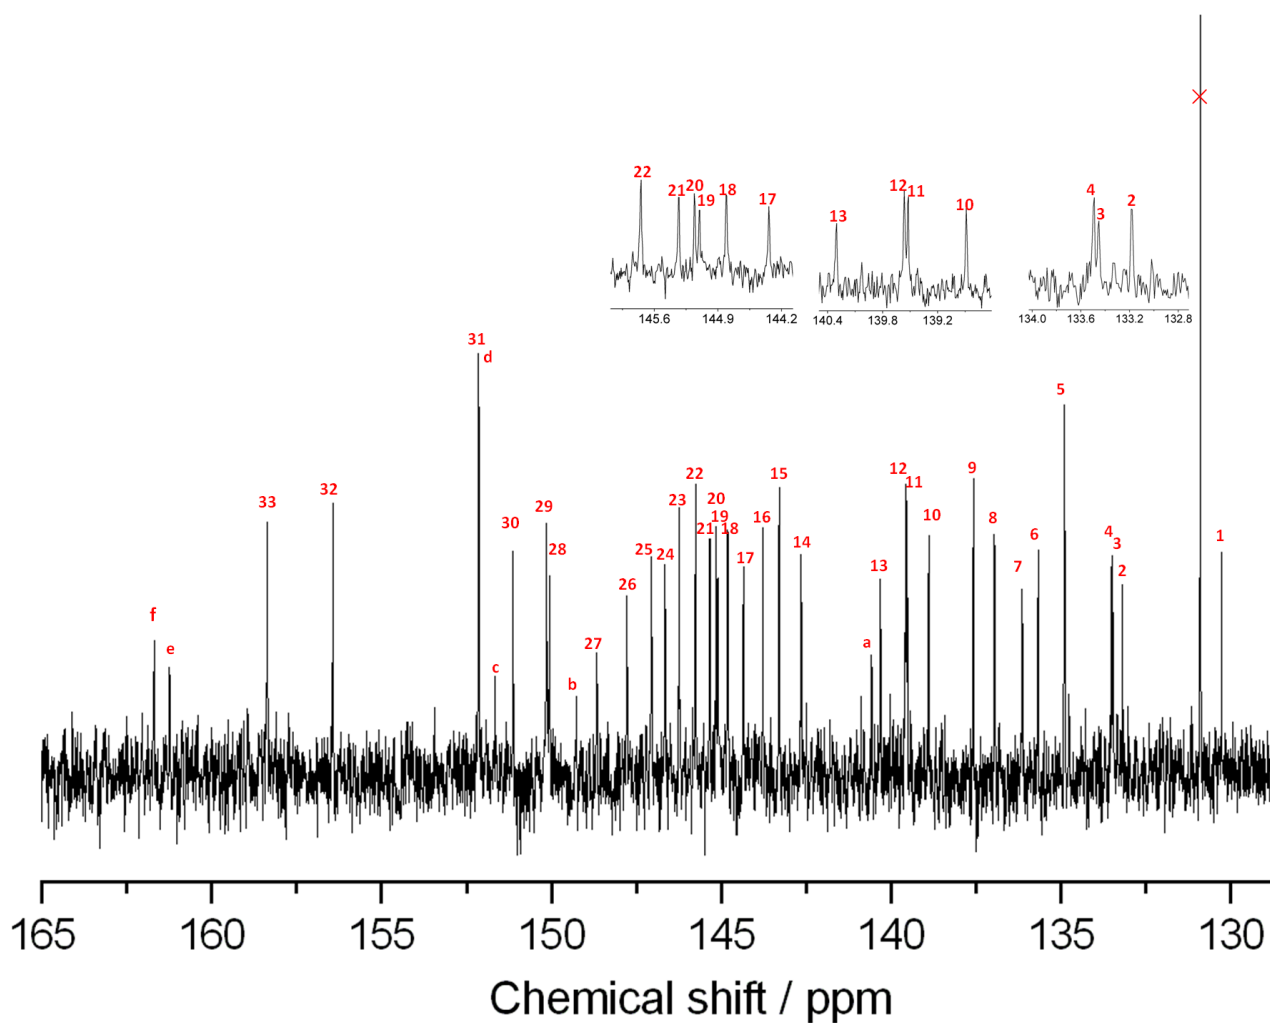

**Figure S11.** Experimental  $^{13}\text{C}$  NMR Chemical Shifts for  $\text{Sc}_2\text{C}_2@C_{72}\text{-C}_s$ . 33 signals with full intensity and six signals with half intensity are marked with Arabic numerals and letters, respectively.

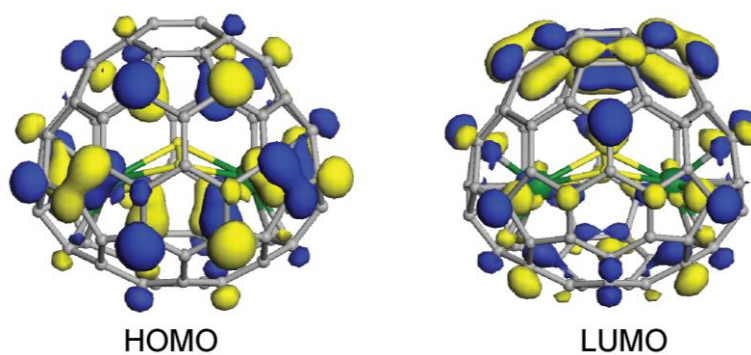

**Figure S12.** DFT calculated isodensity surface plots for the HOMO and LUMO of  $\text{Sc}_2\text{C}_2@C_s(10528)\text{-C}_{72}$ .



**Table S2.** Experimental and Calculated <sup>13</sup>C NMR Chemical Shifts for Sc<sub>2</sub>C<sub>2</sub>@C<sub>72</sub>-C<sub>s</sub>.

| Site       | Calculated δ (ppm) | Experimental δ (ppm) | Intensity                |
|------------|--------------------|----------------------|--------------------------|
| 35-C       | 163.7024           | 161.69               | 1                        |
| 34-C       | 162.5013           | 161.25               | 1                        |
| 39-C       | 152.0877           | 152.14               | (overlapped with 1,72-C) |
| 38-C       | 150.6507           | 151.67               | 1                        |
| 37-C       | 149.568            | 149.26               | 1                        |
| 36-C       | 143.7849           | 140.56               | 1                        |
| 29-C, 44-C | 157.7987           | 158.37               | 2                        |
| 22-C, 51-C | 155.1819           | 156.43               | 2                        |
| 1-C, 72-C  | 152.6885           | 152.14               | (overlapped with 39-C)   |
| 26-C, 47-C | 151.2228           | 151.13               | 2                        |
| 28-C, 45-C | 150.8183           | 150.15               | 2                        |
| 14-C, 59-C | 149.1547           | 150.05               | 2                        |
| 2-C, 71-C  | 147.7982           | 148.66               | 2                        |
| 21-C, 52-C | 147.4193           | 147.77               | 2                        |
| 30-C, 43-C | 147.2213           | 147.04               | 2                        |
| 15-C, 58-C | 146.9127           | 146.65               | 2                        |
| 25-C, 48-C | 145.3566           | 146.23               | 2                        |
| 18-C, 55-C | 144.8773           | 145.75               | 2                        |
| 31-C, 42-C | 144.8033           | 145.33               | 2                        |
| 27-C, 46-C | 144.6006           | 145.16               | 2                        |
| 6-C, 67-C  | 144.5249           | 145.10               | 2                        |
| 23-C, 50-C | 144.1111           | 144.81               | 2                        |
| 32-C, 41-C | 144.1108           | 144.34               | 2                        |
| 33-C, 40-C | 143.9319           | 143.77               | 2                        |
| 3-C, 70-C  | 143.081            | 143.29               | 2                        |
| 11-C, 62-C | 142.7931           | 142.64               | 2                        |
| 19-C, 54-C | 140.9732           | 140.30               | 2                        |
| 7-C, 66-C  | 139.9188           | 139.56               | 2                        |
| 24-C, 49-C | 139.7119           | 139.52               | 2                        |
| 20-C, 53-C | 138.9339           | 138.89               | 2                        |
| 16-C, 57-C | 137.2097           | 137.57               | 2                        |
| 9-C, 64-C  | 136.1229           | 136.95               | 2                        |
| 4-C, 69-C  | 135.9673           | 136.13               | 2                        |
| 13-C, 60-C | 135.4612           | 135.66               | 2                        |
| 8-C, 65-C  | 135.0854           | 134.89               | 2                        |
| 17-C, 56-C | 134.4886           | 133.49               | 2                        |
| 12-C, 61-C | 134.2862           | 133.45               | 2                        |
| 5-C, 68-C  | 134.23             | 133.19               | 2                        |
| 10-C, 63-C | 130.5157           | 130.26               | 2                        |

**Cartesian coordinates of Sc<sub>2</sub>C<sub>2</sub>@C<sub>72</sub>-C<sub>s</sub> predicted at the PBE/DNP level of theory:**

|   |           |           |           |
|---|-----------|-----------|-----------|
| C | 1.034995  | -0.993198 | -4.181923 |
| C | -0.388104 | -1.242047 | -4.114364 |
| C | 1.232105  | 0.435459  | -4.037446 |
| C | -1.080023 | 0.002705  | -3.923640 |
| C | -0.077390 | 1.063310  | -3.894953 |
| C | 1.696811  | -1.931290 | -3.287857 |
| C | -0.636249 | -2.335623 | -3.209860 |
| C | 2.266695  | 0.888227  | -3.168902 |
| C | -0.270988 | 2.254139  | -3.095285 |
| C | -2.249836 | 0.059874  | -3.083938 |
| C | 0.657336  | -2.803825 | -2.735366 |
| C | 3.076307  | -0.055117 | -2.414198 |
| C | 2.743573  | -1.461473 | -2.398597 |
| C | -1.586053 | 2.438278  | -2.594715 |
| C | -2.561643 | 1.355252  | -2.583193 |
| C | 2.125601  | 2.092984  | -2.397428 |
| C | -1.790861 | -2.332115 | -2.348061 |
| C | 0.875096  | 2.807539  | -2.353934 |
| C | -2.666332 | -1.142966 | -2.331904 |
| C | 0.791048  | -3.427188 | -1.443664 |
| C | 3.528728  | 0.625487  | -1.226258 |
| C | 2.951558  | 1.946451  | -1.226312 |
| C | -1.822551 | 3.246148  | -1.421825 |
| C | -3.385010 | 1.518919  | -1.416403 |
| C | 2.927601  | -2.159508 | -1.160063 |
| C | -1.674980 | -3.131224 | -1.171760 |
| C | 0.613528  | 3.559392  | -1.174879 |
| C | -3.479335 | -0.935856 | -1.181759 |
| C | -2.940681 | 2.696333  | -0.700858 |
| C | 1.999702  | -3.175778 | -0.716386 |
| C | -0.410820 | -3.675299 | -0.723177 |
| C | -0.734400 | 3.783488  | -0.723356 |
| C | -3.823958 | 0.387173  | -0.726730 |
| C | 1.446517  | 3.424572  | 0.000000  |
| C | -3.326937 | -1.752535 | 0.000000  |
| C | 2.597843  | 2.587429  | 0.000000  |
| C | -2.441129 | -2.823153 | 0.000000  |
| C | 3.719856  | -0.084752 | 0.000000  |
| C | 3.456871  | -1.498300 | 0.000000  |
| C | -3.823958 | 0.387173  | 0.726730  |
| C | -0.734400 | 3.783488  | 0.723356  |
| C | -0.410820 | -3.675299 | 0.723177  |
| C | 1.999702  | -3.175778 | 0.716386  |

|    |           |           |           |
|----|-----------|-----------|-----------|
| C  | -2.940681 | 2.696333  | 0.700858  |
| C  | -3.479335 | -0.935856 | 1.181759  |
| C  | 0.613528  | 3.559392  | 1.174879  |
| C  | -1.674980 | -3.131224 | 1.171760  |
| C  | 2.927601  | -2.159508 | 1.160063  |
| C  | -3.385010 | 1.518919  | 1.416403  |
| C  | -1.822551 | 3.246148  | 1.421825  |
| C  | 2.951558  | 1.946451  | 1.226312  |
| C  | 3.528728  | 0.625487  | 1.226258  |
| C  | 0.791048  | -3.427188 | 1.443664  |
| C  | -2.666332 | -1.142966 | 2.331904  |
| C  | 0.875096  | 2.807539  | 2.353934  |
| C  | -1.790861 | -2.332115 | 2.348061  |
| C  | 2.125601  | 2.092984  | 2.397428  |
| C  | -2.561643 | 1.355252  | 2.583193  |
| C  | -1.586053 | 2.438278  | 2.594715  |
| C  | 2.743573  | -1.461473 | 2.398597  |
| C  | 3.076307  | -0.055117 | 2.414198  |
| C  | 0.657336  | -2.803825 | 2.735366  |
| C  | -2.249836 | 0.059874  | 3.083938  |
| C  | -0.270988 | 2.254139  | 3.095285  |
| C  | 2.266695  | 0.888227  | 3.168902  |
| C  | -0.636249 | -2.335623 | 3.209860  |
| C  | 1.696811  | -1.931290 | 3.287857  |
| C  | -0.077390 | 1.063310  | 3.894953  |
| C  | -1.080023 | 0.002705  | 3.923640  |
| C  | 1.232105  | 0.435459  | 4.037446  |
| C  | -0.388104 | -1.242047 | 4.114364  |
| C  | 1.034995  | -0.993198 | 4.181923  |
| Sc | 0.381634  | -0.444787 | -2.087720 |
| Sc | 0.381634  | -0.444787 | 2.087720  |
| C  | -0.655833 | -0.029926 | 0.000000  |
| C  | 0.556609  | 0.348943  | 0.000000  |

## References

- S1 N. Chen, C. M. Beavers, M. Mulet-Gas, A. Rodríguez-Fortea, E. J. Munoz, Y.-Y. Li, M. M. Olmstead, A. L. Balch, J. M. Poblet and L. Echegoyen, *J. Am. Chem. Soc.*, 2012, **134**, 7851-7860.
- S2 H. Shinohara, *Rep. Prog. Phy.*, 2000, **63**, 843.
- S3 J. P. Perdew, K. Burke and M. Ernzerhof, *Phys. Rev. Lett.* 1996, **77**, 3865-3868.

- S4. B. Delley, *J. Chem. Phys.* 1990, **92**, 508-517.
- S5. B. Delley, *J. Chem. Phys.* 2000, **113**, 7756. DMol3 is available as part of Material Studio.
